# Supplementary material for: Impairment of insulin signalling in peripheral tissue fails to extend murine lifespan
Source: PubMed Central journal article supplement (PMC5506415; doi:10.1111/acel.12610), 2017-05-22

# Supplementary Figure 1

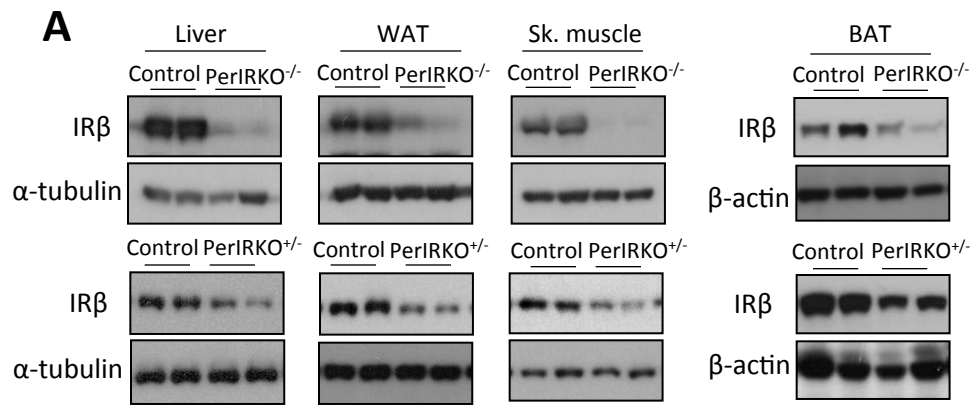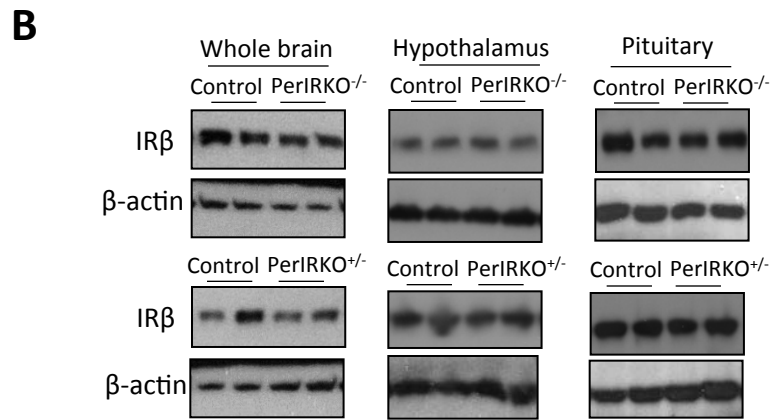

# Supplementary Figure 2

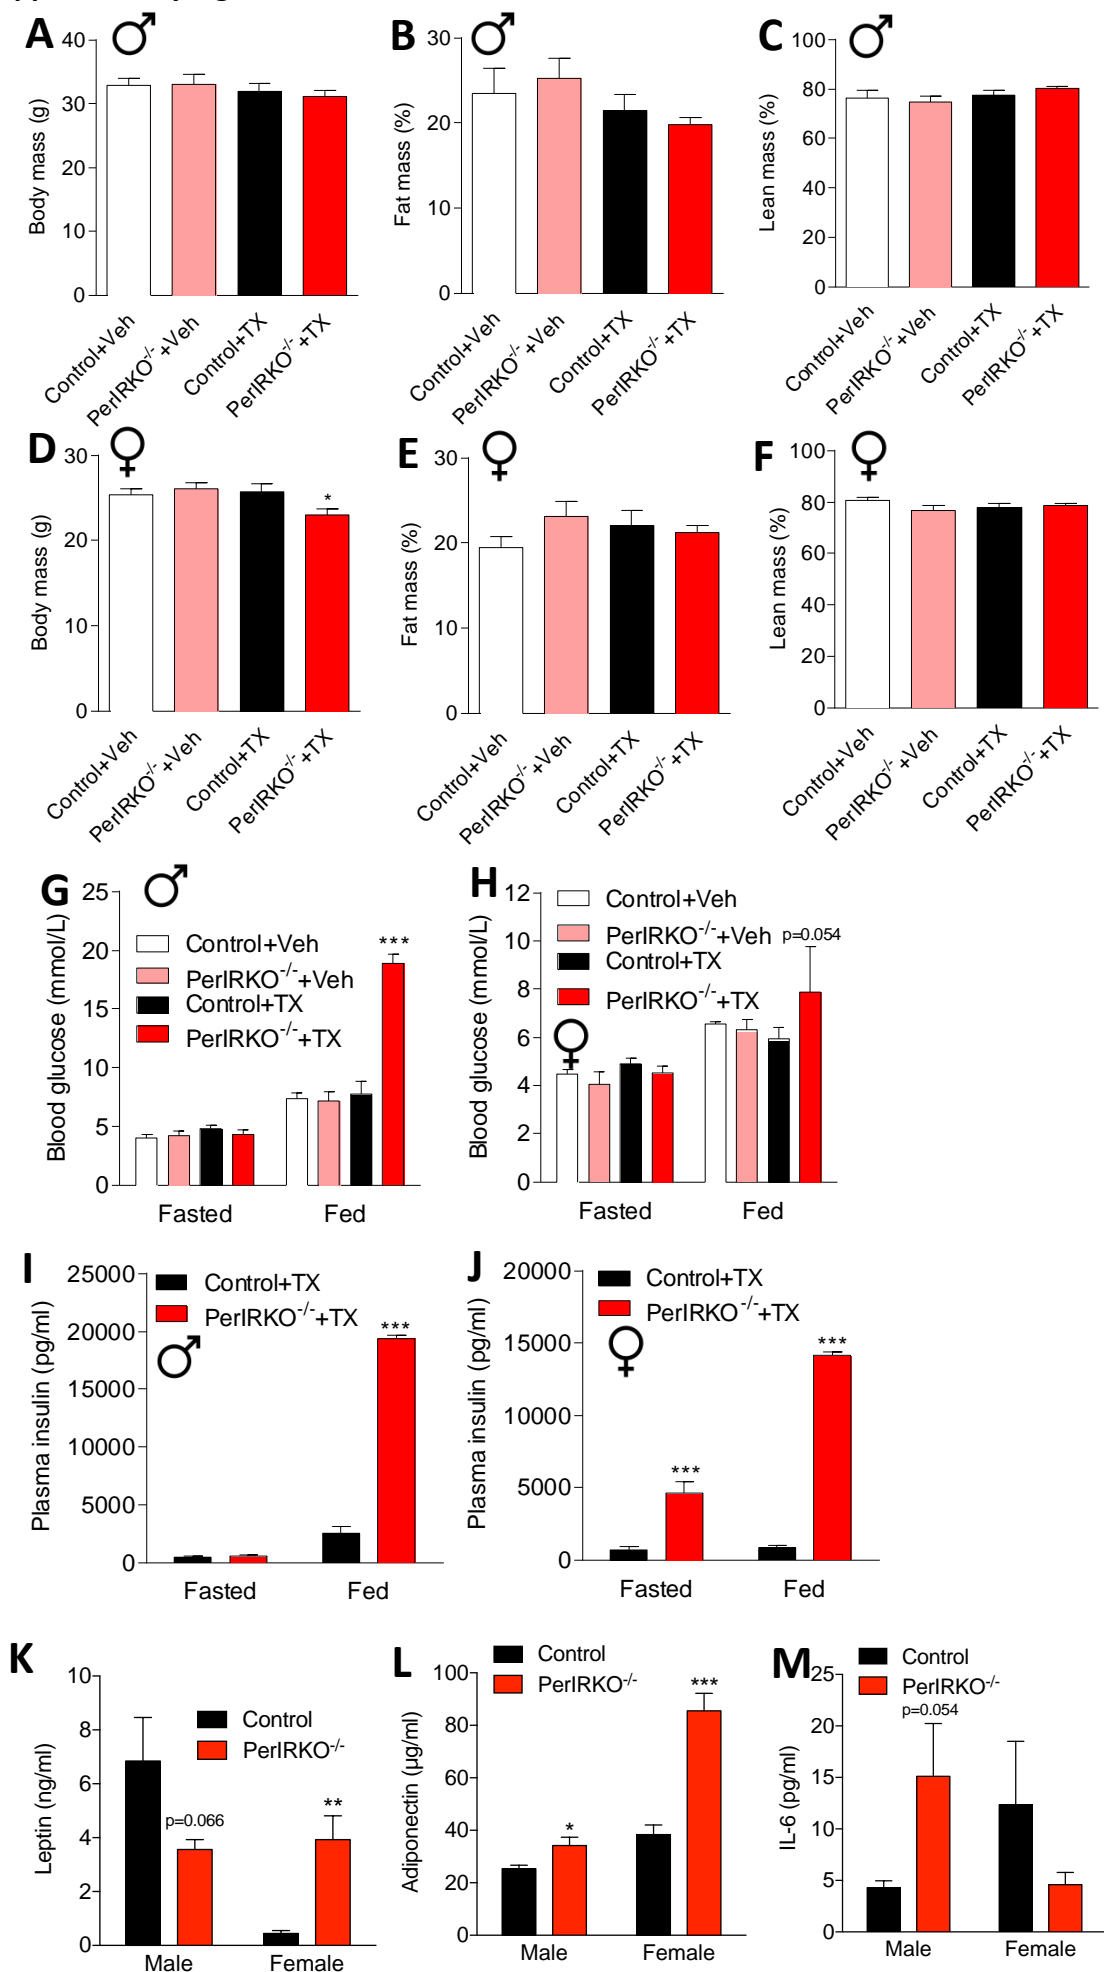

**Supplementary Figure 3**

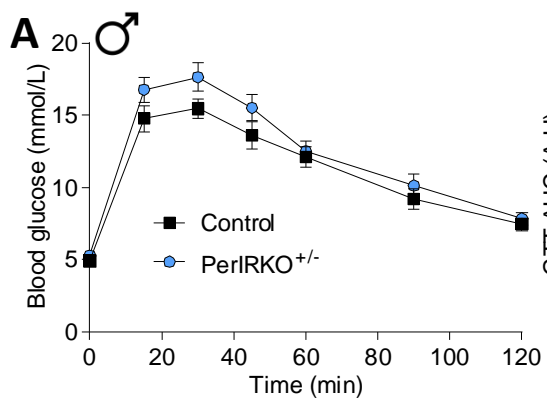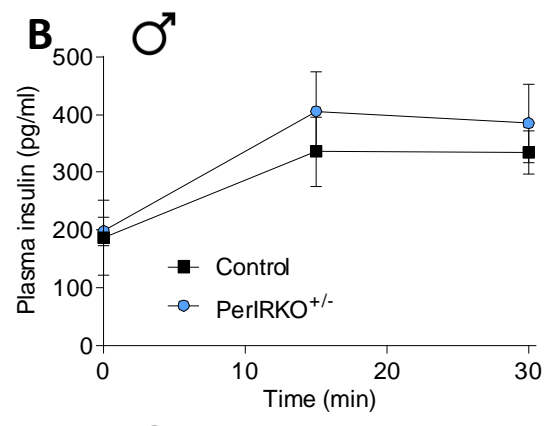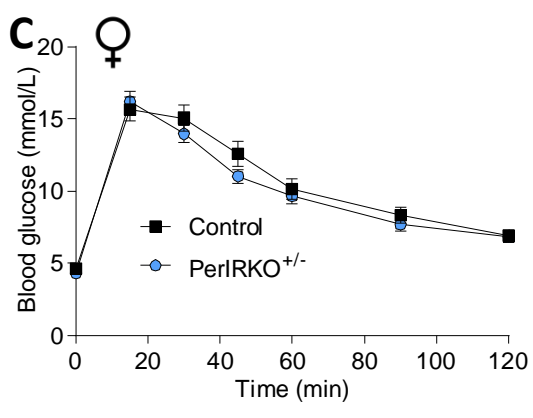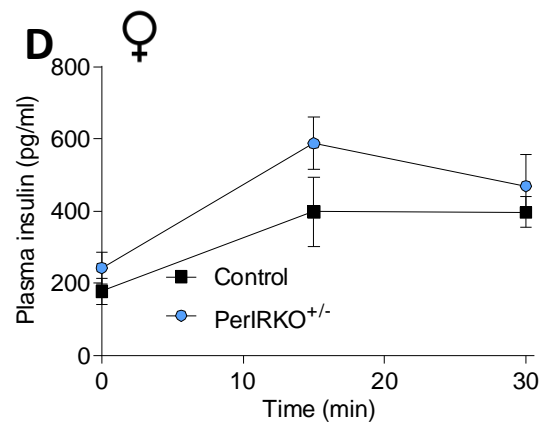

**Supplementary Figure 4**

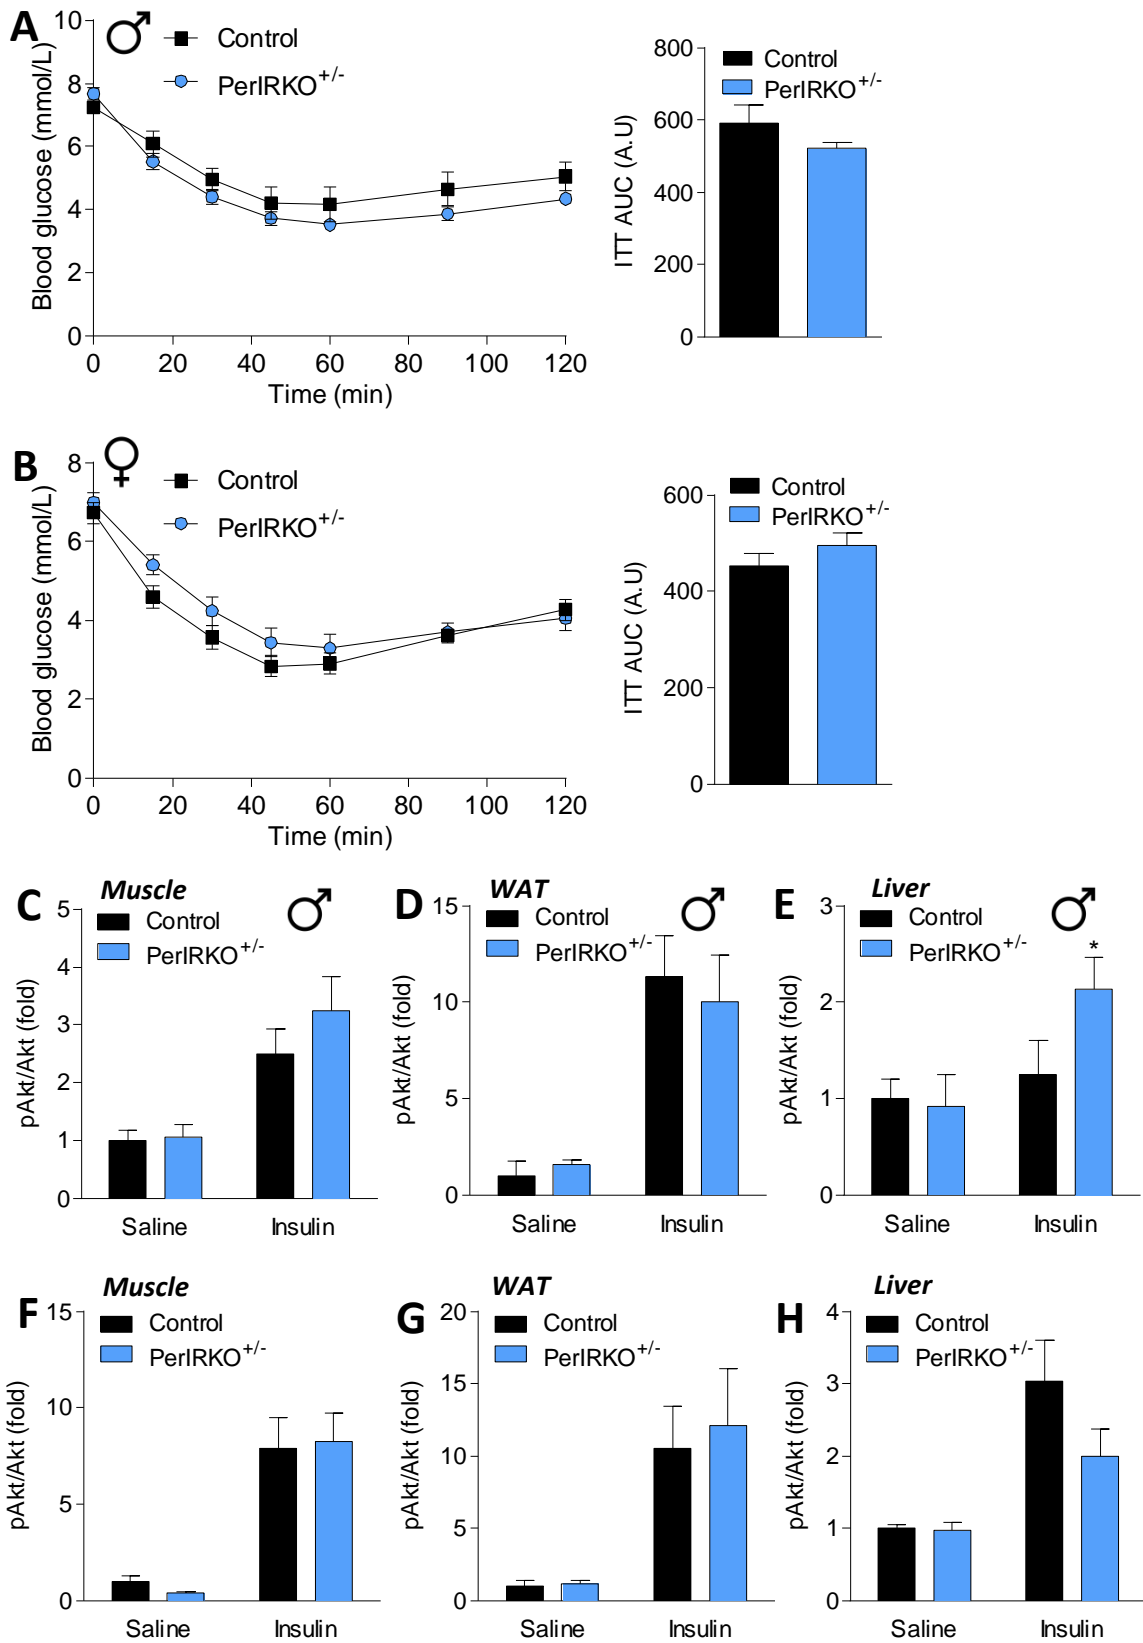

Supplement: ACEL-16-761-s001.pdf [file ACEL-16-761-s001.pdf]
